# Supplementary material
Source: PubMed Central journal article supplement (PMC7054297)
Supplement: 41422_2019_267_MOESM1_ESM.pdf [file 41422_2019_267_MOESM1_ESM.pdf]

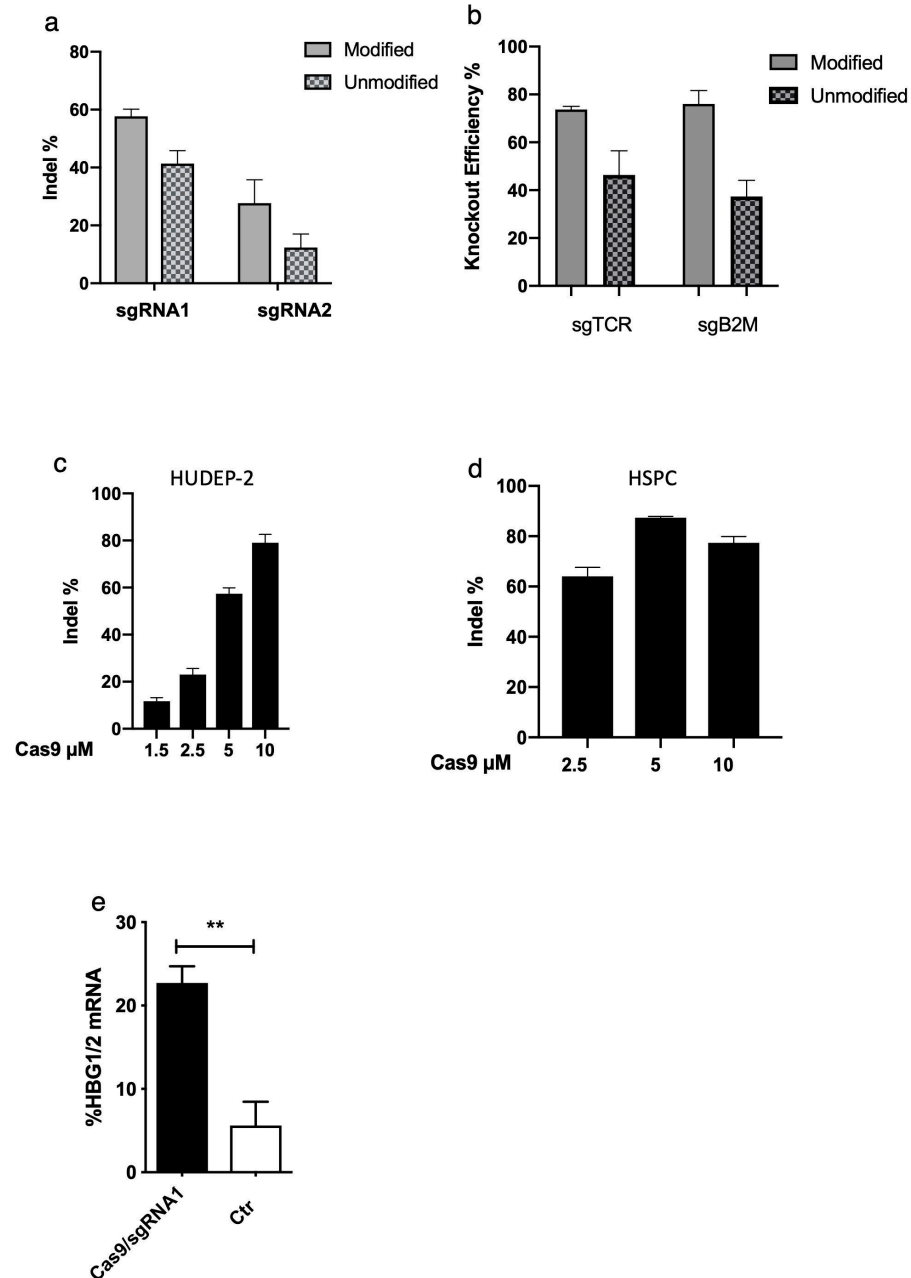

1  
2 **Figure S1. a-b** Genomic editing efficiencies with modified or unmodified sgRNA on HBG promoter (a) in HUDPE-  
3 2 cells or TCR and B2M locus (b) in human primary T cells. **c-d** Indel frequency in HUDEP-2 (c) or HSPCs (d)  
4 electroporated with increasing concentrations of RNP complex. **e**  $\gamma$ -globin mRNA level of HUDEP-2 cell line  
5 electroporated with Cas9 RNP targeting the HBG promoter. (all data presented in the graph as mean  $\pm$  s.d., \*\*,   
6  $p < 0.01$ )

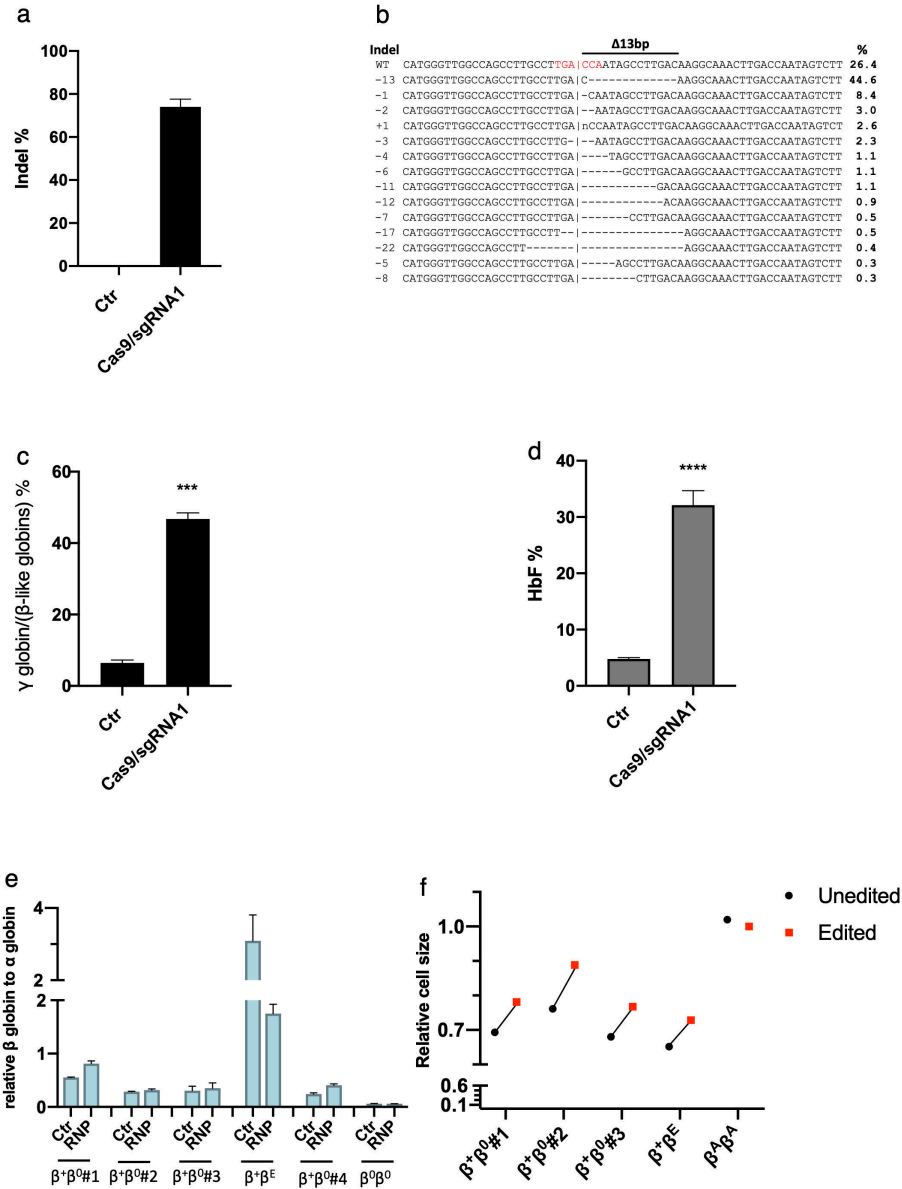

7

8

9

10

11

12

13

14

**Figure S2. a** Indel frequency of healthy HSPCs electroporated with Cas9/sgrRNA1 complex or Cas9 only. **b** The most frequent indel patterns in HSPCs. Red letters indicate the BCL11A binding site. Pattern frequencies are listed to the right. Δ13bp, 13-bp deletion naturally occurred in HPFH patients. **c-d** Elevation of γ-globin mRNA expression (c) and HbF level (d) in HSPCs by RNP electroporation (data presented as mean ± s.d.). **e** β-globin mRNA expression in different patient cells electroporated with the RNP complex or not (data presented as mean ± s.d.). **f** Cell sizes of edited or control samples measured by relative forward scatter intensity. β<sup>0</sup>β<sup>0</sup>, β-thalassemia major. β<sup>0</sup>β<sup>+</sup>, β-thalassemia intermedia. β<sup>+</sup>β<sup>E</sup>, β-thalassemia intermedia containing heterozygous E26K point on *HBB* gene. β<sup>A</sup>β<sup>A</sup>, normal alleles.

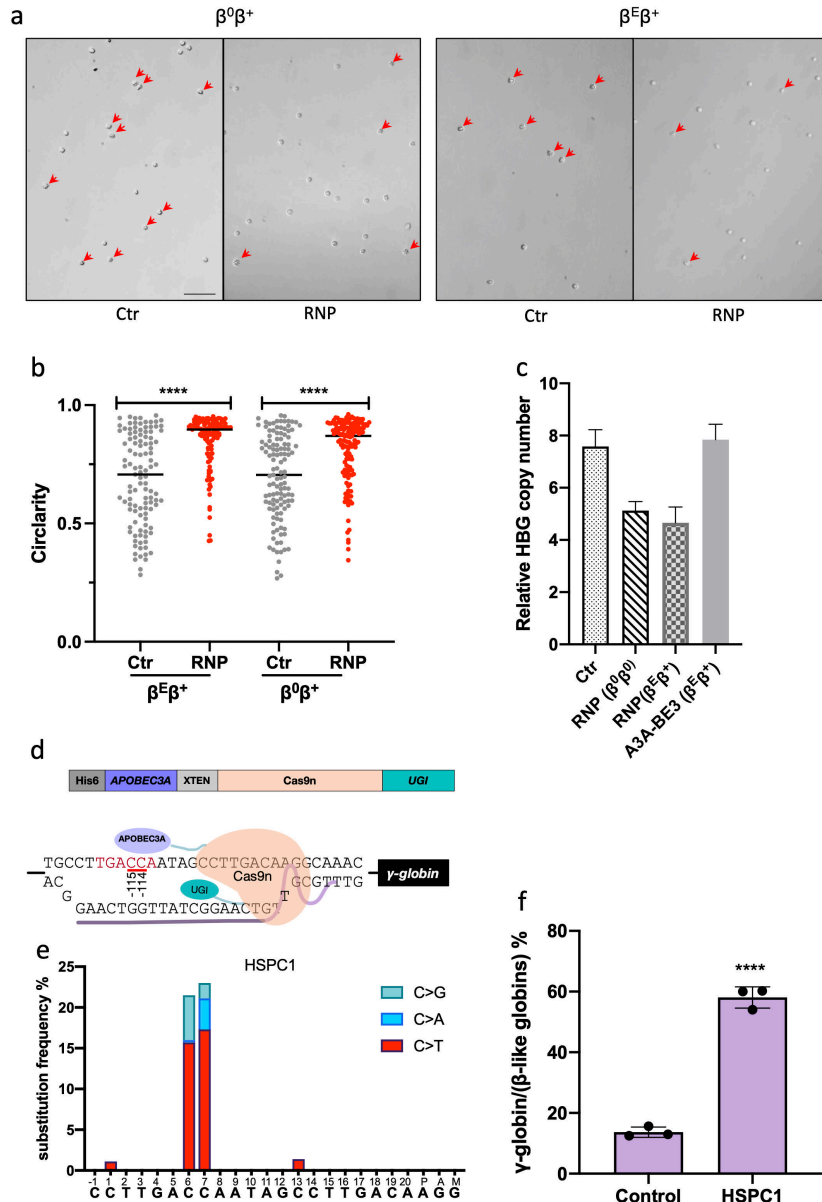

15

16 **Figure S3 a** Representative images of erythroid progenies from unedited/edited patient HSPCs, demonstrating a  
 17 rounder and uniform cell appearance followed by HBG promoter editing. Red arrows indicate poikilocyte. Scale bar,  
 18 50  $\mu$ m.

19 **b** Cell circularities calculated by imageJ software. **c** Relative HBG copy number calculated by quantitative  
 20 real time PCR.

21 **d** Schematic view of the hA3A-BE vector and its targeting of the BCL11A binding site. BCL11A  
 22 binding site is labeled in red, -114C and -115C are underlined.

23 **e** C to D (A, T, or G) substitution frequencies induced by hA3A-BE in the targeted region in healthy HSPCs. The -115C and -114C of the HBG promoter is underlined. **f**  $\gamma$ -  
 globin mRNA level ( $\gamma/(\gamma+\beta)$ ) in HSPCs edited with hA3A-BE RNP complex or not. (All data presented in the graph  
 as mean  $\pm$  s.d., \*\*\*\*,  $p < 0.0001$ ,  $n = 3$ ).

24 Supplementary Table S1

25 **Deep sequencing analysis of the top predicted off-target sites**

|    | target sequence                                     | match | mismatch | type       | off target rate |
|----|-----------------------------------------------------|-------|----------|------------|-----------------|
| WT | CTTGTCAAGGCTATTGGTCA                                |       |          |            |                 |
| 1  | CTT <b>GGCTT</b> GGCTATTGGTCA                       | 17/20 | 3        | intronic   | <0.1%           |
| 2  | CT <b>AGT</b> CAAGGCTGTTTGTC <b>A</b>               | 17/20 | 3        | intronic   | <0.1%           |
| 3  | CTTGTCA <b>GGGCTGTTGGT<b>CG</b></b>                 | 17/20 | 3        | intronic   | <0.1%           |
| 4  | CTTGT <b>CCAGGCT<b>GCTGG<b>GCA</b></b></b>          | 16/20 | 4        | intergenic | <0.1%           |
| 5  | CTTGT <b>CCAGGCT<b>CCTGG<b>GCA</b></b></b>          | 16/20 | 4        | intergenic | <0.1%           |
| 6  | CTTGT <b>CCAGGCT<b>CCTGG<b>GCA</b></b></b>          | 16/20 | 4        | intergenic | <0.1%           |
| 7  | CTTGT <b>CCAGGCT<b>CCTGG<b>GCA</b></b></b>          | 16/20 | 4        | intergenic | <0.1%           |
| 8  | CTTGTCAAGGCT <b>TTATGT<b>AA</b></b>                 | 16/20 | 4        | intergenic | <0.1%           |
| 9  | CT <b>AGT</b> CAAGGC <b>AATT<b>AG<b>GCA</b></b></b> | 16/20 | 4        | intronic   | <0.1%           |
| 10 | <b>TTTGTCT<b>AGGATATT<b>G<b>CTCA</b></b></b></b>    | 16/20 | 4        | intergenic | <0.1%           |
| 11 | CTTGT <b>GATGG<b>CGAT<b>GGTCA</b></b></b>           | 16/20 | 4        | intronic   | <0.1%           |
| 12 | CT <b>GGGA</b> AAGGCTATTGGT <b>AA</b>               | 16/20 | 4        | intronic   | <0.1%           |

26

27

28 Supplementary Table S2

29 **Deep-seq analysis of indels in G $\gamma$  and A $\gamma$  target region**

30

31 Supplementary Table S3

32 **sgRNA-dependent off-target sites analysis of hA3A-BE**

33

34

35

36

37

38

39

40

41

42

43

44

45

46

47

48

49

50

51 Supplementary Table S4

52 **Primers used in this study**

| <b>Quantification PCR</b> |                                |
|---------------------------|--------------------------------|
| <b>ID</b>                 | <b>sequence (5'-3')</b>        |
| HBA-f                     | GCCCTGGAGAGGATGTTC             |
| HBA-r                     | TTCTTGCCGTGGCCCTTA             |
| HBB-f                     | TGAGGAGAAGTCTGCCGTTAC          |
| HBB-R                     | ACCACCAGCAGCCTGCCCA            |
| HBG-F                     | GGTTATCAATAAGCTCCTAGTCC        |
| HBG-R                     | ACAACCAGGAGCCTTCCCA            |
| HBG_copy_number-f         | GCTCCTAGTCCAGACGCC             |
| HBG_copy_number-r         | GCCTACCTTCCCAGGGTTTC           |
| Sp1-promoter-f            | ACCTCTCCGCCCACTAGGA            |
| Sp1-promoter-r            | CAACGGCCAACCAGAATCC            |
| <b>Sanger Sequencing</b>  |                                |
| <b>ID</b>                 | <b>sequence (5'-3')</b>        |
| Check F                   | GCCTACCTTCCCAGGGTTTC           |
| Check R                   | ATCGGAACAAGGCAAAGGCT           |
| <b>Deep sequencing</b>    |                                |
| <b>ID</b>                 | <b>sequence (5'-3')</b>        |
| HBG1/2_F                  | CTTCCCACACTATCTCAATG           |
| HBG1/2_R                  | GTGTGGAAGTCTGAAGGGTG           |
| A_gamma_F                 | GGCTATAAAAAAAAAATTAGCAGTATCC   |
| G_gamma_F                 | GGCTATAAAAAAAAAATTAAGCAGC      |
| Common_R                  | ATAACCTCAGACGTTCCAGAAGCGAGTGTG |

53

54

55 **Materials and Methods**

56 **Cell culture.** Healthy donors and  $\beta$ -thalassemia patients were from the first affiliated hospital of  
57 Guangxi Medical University. Bone marrow (BM) blood of donors or patients was collected  
58 following hospital ethics review board approval and informed patient consent. BM blood was then  
59 diluted using DPBS (1:1 v/v) and layered on Ficoll-Paque (GE), followed by centrifuging at 500g  
60 for 45 min with the acceleration and brake off. Monocytes were harvested after centrifuging and  
61 CD34<sup>+</sup> cells were enriched using the Diamond CD34<sup>+</sup> Isolation Kit according to the  
62 manufacturer's protocol. Purified CD34<sup>+</sup> cells were cryopreserved before experiments. One day  
63 before RNP electroporation, CD34<sup>+</sup> cells were thawed and cultured in X-VIVO 15 (Lonza)  
64 supplemented with human stem cell factor (hSCF, 100ng/ml, peprotech), human thrombopoietin  
65 (hTPO, 100 ng/ml, peprotech), and human Flt3-ligand (hFlt3-L, 100 ng/ml, peprotech). For  
66 erythroid differentiation, 24 hours after electroporation (day 0 of differentiation), cells were  
67 transferred into IMDM medium supplemented with 1% L-glutamine, 330  $\mu$ g/ml holo-human  
68 transferrin, 10  $\mu$ g/ml recombinant human insulin, 2 IU/ml heparin, 5% pooled human  
69 solvent/detergent-treated plasma AB, 3 IU/ml erythropoietin, 100 ng/ml hSCF, 5 ng/ml human IL-  
70 3 (sigma),  $10^{-6}$ M hydrocortisone, as phase-1. On day 8 of differentiation, IL-3 and hydrocortisone  
71 were removed from the medium above, as phase-2. On day 12, hSCF was removed from the the  
72 phase-2 medium, as phase-3. Cells were harvested on day 18 for subsequent analysis. HUDEP-2  
73 cells were kept in SFEM medium (stem cell) supplemented with 50ng/ml hSCF, 3 IU/ml  
74 Erythropoietin (EPO), 10  $\mu$ M Dexamethasone (DEX), 1  $\mu$ g/ml Doxycycline DOX. For erythroid  
75 differentiation of HUDEP-2 cells, cells were cultured in phase-2 medium supplemented with  
76 1 $\mu$ g/ml Dox for 4 days and transferred into phase 3 medium for another 3 days before harvesting.

77

78 **RNP electroporation.** Cas9 was purchased from Aldevron. Guide RNAs were synthesized from  
79 Synthego (modified) or Genscript (unmodified). CD34<sup>+</sup> and HUDEP-2 cells were electroporated  
80 using the Lonza 4D Nucleofector. Briefly, cells were spun down at 300g for 10 min and  
81 resuspended in 20 µl electroporation buffer prepared according to the V4XP-3032 kit (Lonza).  
82 RNPs were prepared by incubating 16 µg Cas9 with 300 pmol guide RNA at room temperature for  
83 10 min. Cells and RNP were mixed together and transferred into 16-well cuvettes for  
84 electroporation with program EO-100. After electroporation, cells were incubated at 37 °C for 5  
85 min and washed once using DPBS before they were cultured.

86

87 **Editing efficiencies and Sequencing.** To check editing efficiencies of sgRNA1 and sgRNA2,  
88 genomic DNA was extracted from the CD34<sup>+</sup> or HUDEP-2 cells using the Genome Extraction kit  
89 (Tiangen DP304). Amplicons containing the target sites were amplified using KOD plus DNA  
90 polymerase (TOYOBO) and sent for sanger or deep sequencing. Deep sequencing results of on-  
91 target editing efficiencies in β-thalassemia patient-derived HSPCs were available at BioProject  
92 database: PRJNA558438. Primers used for PCR were provided in supplementary table S4. For  
93 off-target events, potential off-target sites were predicted by the web-based algorithm  
94 (<http://www.rgenome.net/cas-offfinder/>) followed by PCR amplification, deep sequencing and  
95 analyzed by Cas-Analyzer (<http://www.rgenome.net/cas-analyzer>) (for Cas9) or SAMtools for  
96 (hA3A-Cas9). Off-target deep sequencing data is available at BioProject database: PRJNA558438.  
97 For knockout efficiencies on TCR and B2M sites, 48 hours after electroporation, cells were stained  
98 by anti-human TCR or anti-human B2M antibody at 4 °C for 30 min, washed with PBS for three  
99 times and loaded onto the flowcytometry for efficiency determination.

100



101 **Quantification PCR.** For  $\gamma$ -globin expression determination, total mRNA of HUDEP-2 or CD34<sup>+</sup>  
102 cells were first purified using the PicoPure RNA Isolation Kit (Thermo) and reverse transcribed  
103 by Primescript RT Master Mix (TAKARA) according to the manufacturers' protocol. qPCR was  
104 performed with Hieff UNICON SYBR Green Master Mix (Yeasen). For HBG copy number  
105 determination, genomic DNA from RNP treated or control HSPCs was used as qPCR template.  
106 HBG copy number values were normalized to Sp1 promoter numbers. Primers for qPCR are listed  
107 in the supplementary table S4.

108  
109 **Hemoglobin HPLC.** The fetal hemoglobin level from healthy donors was measured using the Bio-  
110 Rad Variant Hemoglobin testing system. For single chain globin variants,  $2 \times 10^6$  erythroid cells  
111 were lysed using 20  $\mu$ l ddH<sub>2</sub>O. Reverse HPLC was performed on an Agilent 1260 infinity II using  
112 the 4.6-nm Aeris 3.6mM Widedpore C4 LC column.

113  
114 **Measurement of cell viability, size, circularity and enucleation.** For the cell viability assay,  
115 HSPCs from patient donors were electroporated with the RNP complex. 48 hours later, cells were  
116 stained with trypan blue. Cell viability was calculated as total unstained cells/total cells. To  
117 calculate the enucleated cells, erythroid progeny cells were stained with the DNA dye Hoechst  
118 33342 (2  $\mu$ g/ml) for 15 min at room temperature, washed three times and then loaded onto the  
119 flowcytometry. Hoechst positive and negative cells were gated and quantitated. Cell size of  
120 hoechst negative cells were calculated by median value of forward scatter intensity normalized by  
121 the intensity from unedited healthy donors. For cell circularity, hoechst negative cells were sorted.  
122 Cell images were taken by Olympus ZX71 inverted microscope. Cell circularity was calculated

123 by Image J software according to the functions,  $Circularity = (4\pi \times Area)/(perimeter)^2$ . For  
124 each group, about 120 cells were calculated.

125  
126 **hA3A-BE purification.** The DNA sequence for hA3A-BE was optimized for E. coli expression,  
127 synthesized and cloned into pET28a vector. The resulting fusion construct contained an N-terminal  
128 hexahistidine (His6) tag. The plasmid was transformed into E. coli strain BL21 (DE3) (Transgen)  
129 and single clone was cultured in 2xTY medium at 25°C until OD 0.8. Then the culture was cooled  
130 to 18°C and induced with 0.2 mM IPTG for expression for 17 hours. Cells were lysed using a  
131 homogenizer (800 bar) in buffer A (20 mM Tris pH 8.0, 500 mM NaCl, 10% glycerol, 1 mM  
132 TCEP). Lysate was centrifuged at 12000 rpm for 1 hour and the supernatant was loaded onto a Ni-  
133 NTA column (GE Life Sciences). hA3A-BE was eluted via a linear gradient of 0-100% buffer B  
134 (20 mM Tris pH 8.0, 500 mM NaCl, 10% glycerol, 1 mM TCEP, 250mM imidazole) followed by  
135 ion exchange purification on a 5 ml SP HiTrap column (GE Life Sciences), eluting with a linear  
136 gradient of 100 mM – 1 M KCl (GE Life Sciences). The eluted protein was further purified by gel  
137 filtration (GE Life Sciences). The final product was concentrated to about 10 mg/ml, flash-frozen  
138 in liquid nitrogen and stored at -80°C.

139
